# Supplementary material for: Vacancy-induced initial decomposition of condensed phase NTO via bimolecular hydrogen transfer mechanisms at high pressure: a DFT-D study
Source: Royal Society of Chemistry journal article supplement (doi:10.1039/c5cp00637f), 2015-01-01
Supplement: c5cp00637f1.pdf [file c5cp00637f1.pdf]

**Supplementary Information**

**Vacancy-Induced Initiation of  $\beta$ -NTO via Bimolecular Hydrogen Transfer at High Pressure: A DFT-D Study**

Zhichao Liu, Qiong Wu, Weihua Zhu,\* Heming Xiao

*Institute for Computation in Molecular and Materials Science and School of Chemical Engineering, Nanjing University of Science and Technology, Nanjing 210094, China*

---

\* Corresponding author. E-mail: [zhuwh@njust.edu.cn](mailto:zhuwh@njust.edu.cn)

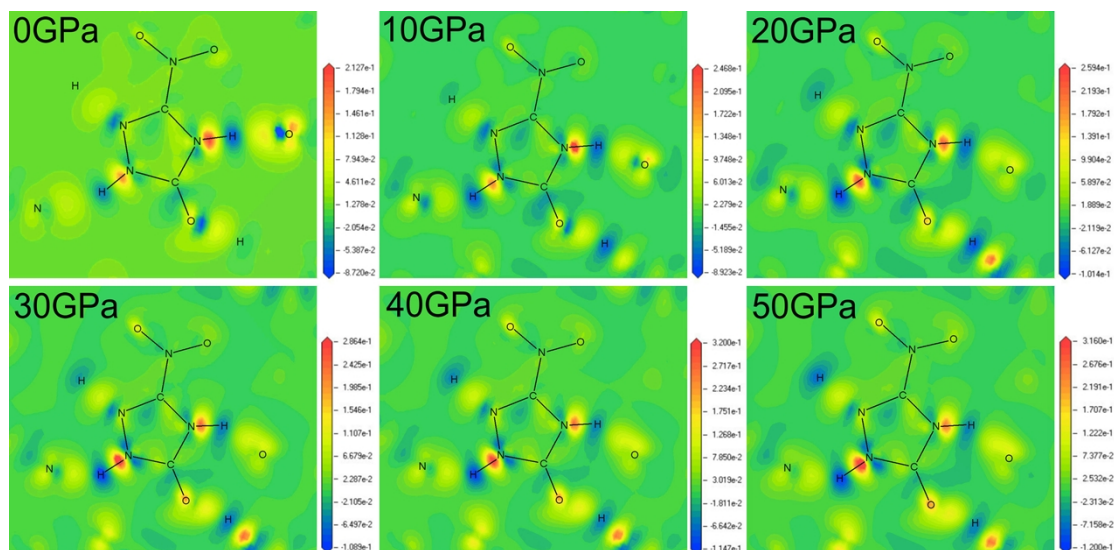

**Fig. S1.** Electron density difference (EDD) map displaying electron delocalization between ideal bulk and independent NTO molecules with slice cutting across the triazole ring of one molecule. The red or blue color denotes a gain or loss of electron density.

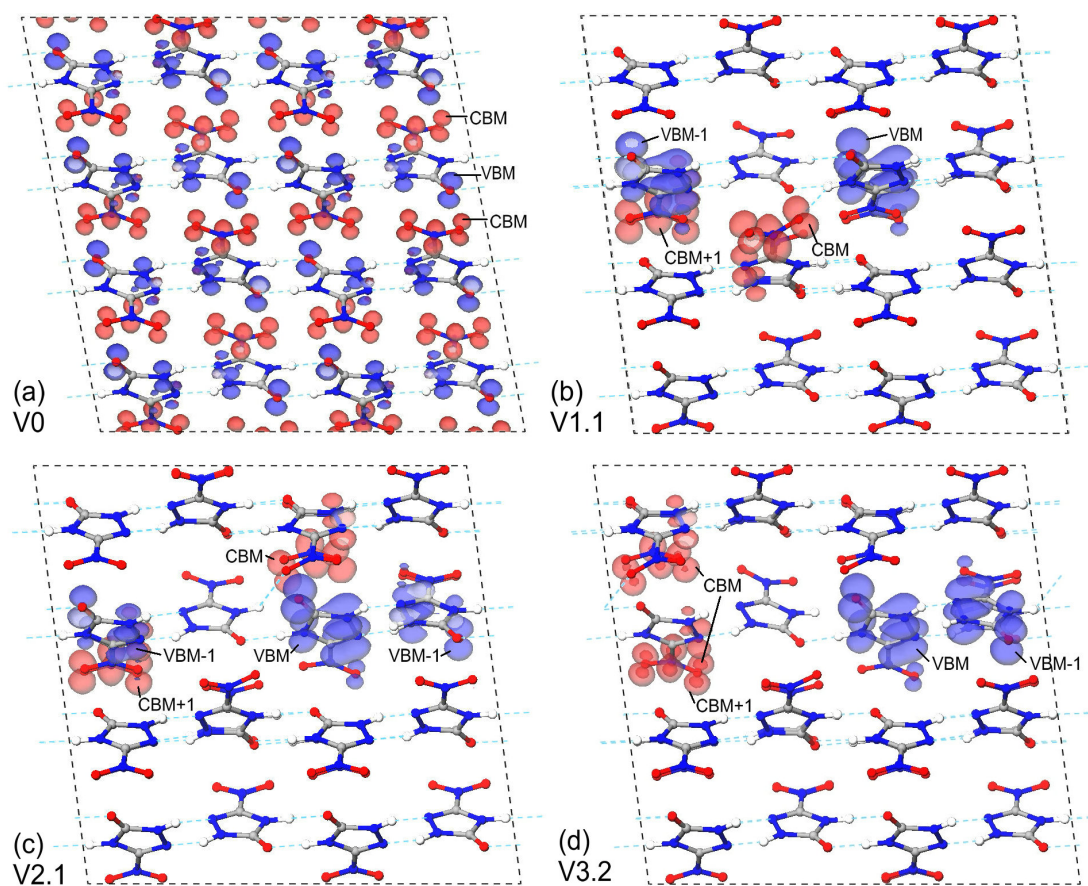

**Fig. S2.** Distributions of frontier orbitals of the ideal bulk crystal and vacancy systems at 0 GPa. The blue orbitals stand for the top of the valence bands and the red ones for the bottom of the conduction bands. The isovalue is defined by 0.005 in (a) and 0.04 in (b)-(d). The hydrogen bond paths are denoted by the dotted lines.

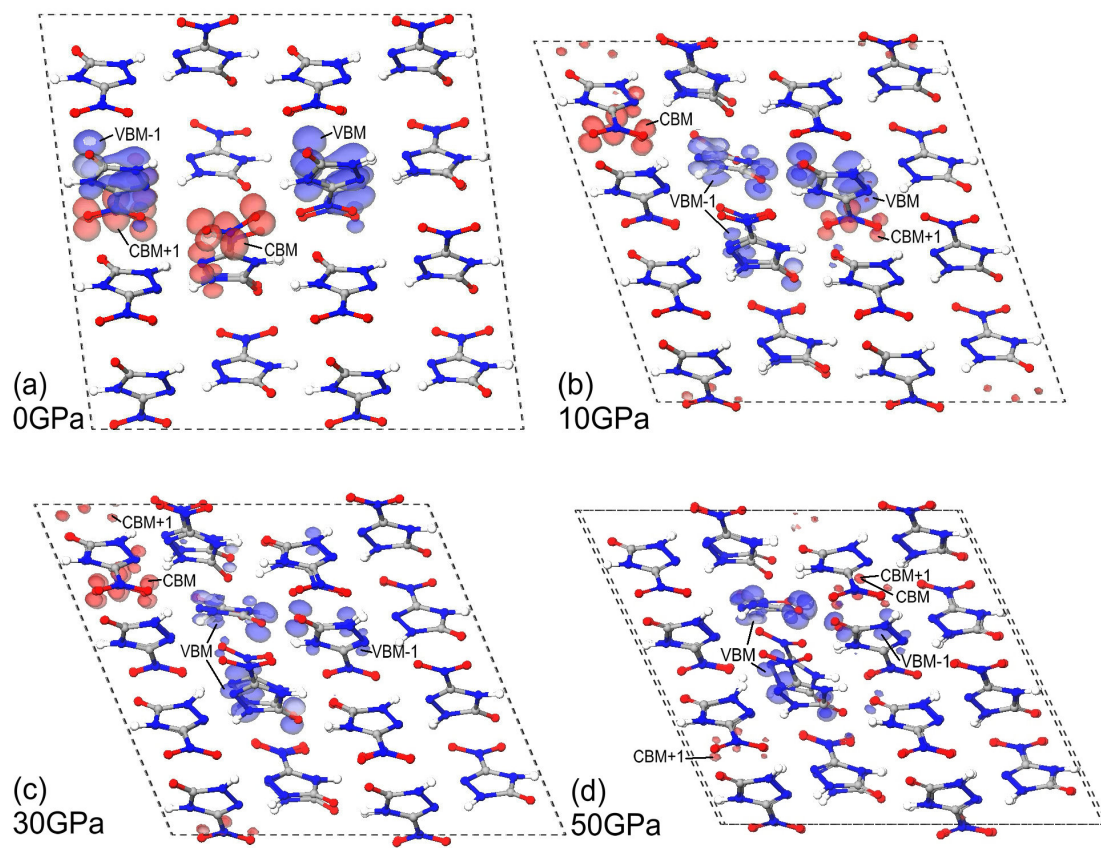

**Fig. S3.** VBM-1, VBM, CBM, and CBM+1 of the monovacancy V1.1 at 0 GPa, 10 GPa, 30 GPa, and 50 GPa. The isovalue is defined by 0.04.
